# Supplementary material
Source: Springer Nature journal article supplement (https://www.springermedizin.de/resource/supplementary/13063_2011_969_MOESM13_ESM.pdf/9619242)

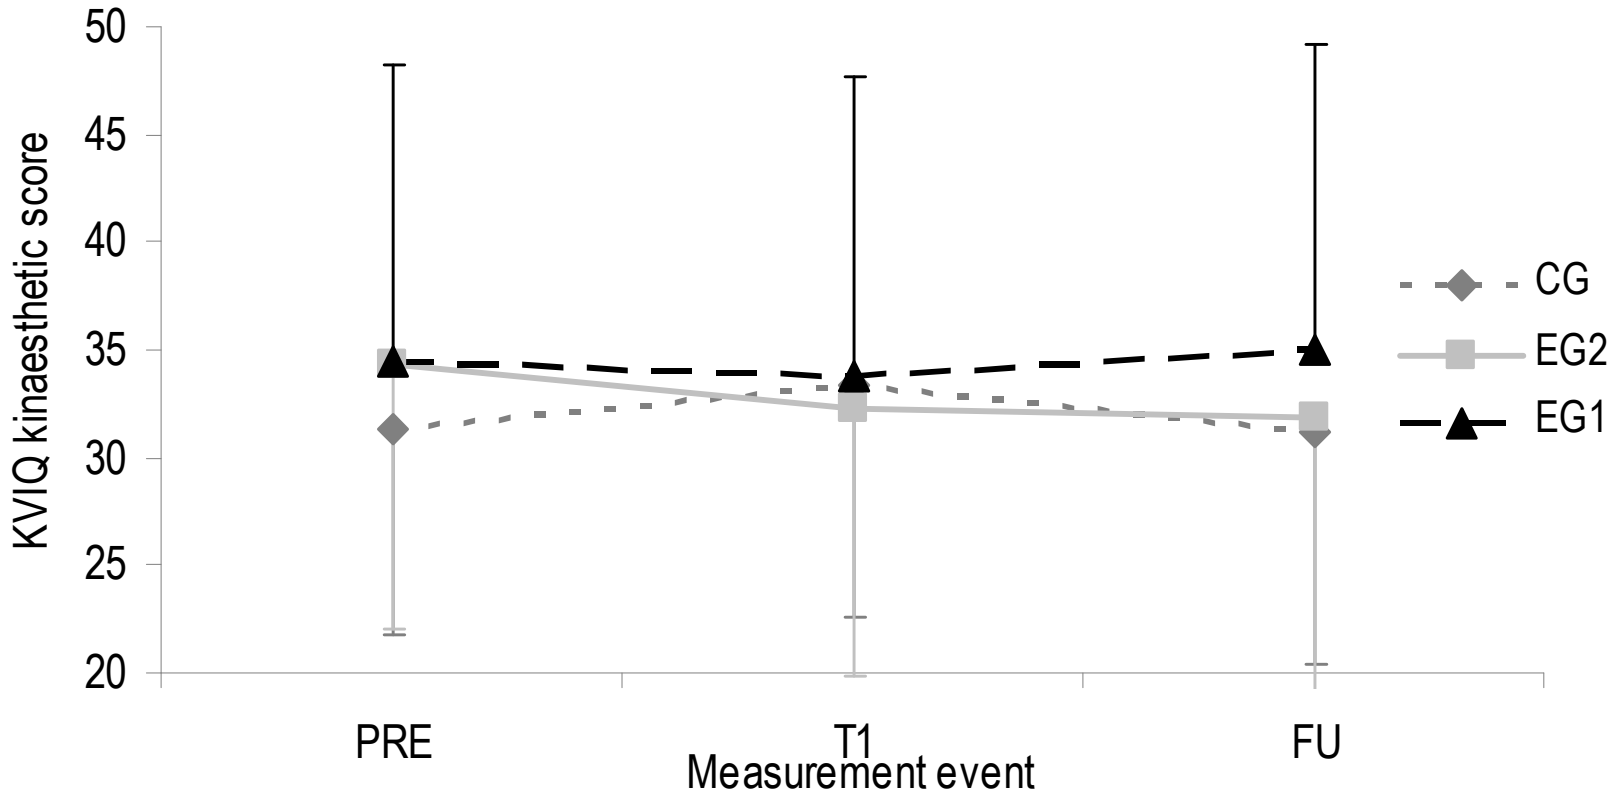

Supplement: MOESM13 [file 9619242]
